# Supplementary material
Source: PubMed Central journal article supplement (PMC3612942)
Supplement: NIHMS371629-supplement-03.pdf [file NIHMS371629-supplement-03.pdf]

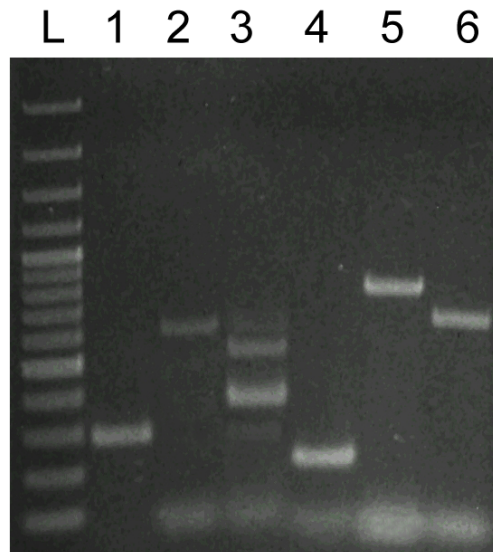

**Supplementary Figure 1.** Detection of a circular extrachromosomal form of ICE/*chBan8*. Ethidium bromide stained 1% agarose gel of PCR products amplified using primers Ban8attP-F/Ban8attP-R ( $attP_{BAN8}$ ), Ban8attB-F/Ban8attB-R ( $attB_{BAN8}$ ), Ban8int-F/Ban8int-R ( $int_{BAN8}$ ), P4/P5 ( $attP_{SXT}$  and  $attP_{IND5}$ ). Lanes: **L** (Gene Ruler 100 bp DNA Ladder Plus, Fermentas); **1**,  $attP_{BAN8}$  (*V. cholerae* MZO-3); **2**,  $attB_{BAN8}$  (*V. cholerae* MZO-3); **3**,  $attL_{BAN8}$  and  $attR_{BAN8}$  (*V. cholerae* MZO-3); **4**,  $int_{BAN8}$  (*V. cholerae* MZO-3); **5**,  $attP_{SXT}$  (*V. cholerae* MO10); **6**,  $attP_{IND5}$  (*V. cholerae* 7452).
